# Supplementary material
Source: publisher site journal article supplement (https://www.dovepress.com/article/333471)
Supplement: Supplementary file 1 [file get_supplementary_file.php]

# Simple and unbiased OSA prescreening: Introduction of a new morphologic OSA prediction score

## Supplementary Data

**Supplementary Table 1** Test variables and their formula.

| Test                        | Sensitivity<br>(true positive rate) | Specificity<br>(true negative rate) | Positive Predictive Value | Negative Predictive Value | Positive Likelihood Ratio | Negative Likelihood Ratio |
|-----------------------------|-------------------------------------|-------------------------------------|---------------------------|---------------------------|---------------------------|---------------------------|
| ACU                         | SEN                                 | SPE                                 | PPV                       | NPV                       | LR+                       | LR-                       |
| $\frac{TP+TN}{TP+FP+TN+FN}$ | $\frac{TP}{TP+FN}$                  | $\frac{TN}{TN+FP}$                  | $\frac{TP}{TP+FP}$        | $\frac{TN}{TN+FN}$        | $\frac{SEN}{1-SPE}$       | $\frac{1-SEN}{SPE}$       |

**Abbreviations:** ACU, test accuracy; SEN, sensitivity; SPE, specificity; PPV, positive predictive value; NPV, negative predictive value; LR+, positive likelihood ratio; LR-, negative likelihood ratio; TP, true positives; TN, true negatives; FP, false positives; FN=false negatives.

**Supplementary Table 2** Test Cohort – Two-by-two outcome table for predicting severity of obstructive sleep apnea.

|                                                           | Total<br>(n=150)   |                    | Score Prediction             |                              |
|-----------------------------------------------------------|--------------------|--------------------|------------------------------|------------------------------|
|                                                           | Total<br>Positives | Total<br>Negatives | Total Positives<br>(TP + FP) | Total Negatives<br>(TN + FN) |
| <b>Severe OSA<br/>(Score ≥8)</b>                          | 34                 | 116                | 49<br>(28 + 21)              | 101<br>(95 + 6)              |
| <b>Exclusion of OSA*<br/>(Score ≤4)</b>                   | 39                 | 111                | 47<br>(28 + 19)              | 103<br>(92 + 11)             |
| <b>Mild to Moderate<br/>OSA<br/>(4 &lt; Score &lt; 8)</b> | 77                 | 73                 | 54<br>(38 + 16)              | 96<br>(57 + 39)              |

**Notes:** \* Here, positive means the exclusion of OSA (not having the disease)

**Abbreviations:** OSA, obstructive sleep apnea; TP, true positives; FP, false positives; TN, true negatives; FN, false negatives.

**Supplementary Table 3** Validation Cohort – Two-by-two outcome table for predicting severity of obstructive sleep apnea.

|                                                           | Total<br>(n=50)    |                    | Score Prediction             |                              |
|-----------------------------------------------------------|--------------------|--------------------|------------------------------|------------------------------|
|                                                           | Total<br>Positives | Total<br>Negatives | Total Positives<br>(TP + FP) | Total Negatives<br>(TN + FN) |
| <b>Severe OSA<br/>(Score ≥8)</b>                          | 18                 | 32                 | 19<br>(15 + 4)               | 31<br>(28 + 3)               |
| <b>Exclusion of OSA*<br/>(Score ≤4)</b>                   | 5                  | 45                 | 15<br>(5 + 10)               | 35<br>(35 + 0)               |
| <b>Mild to Moderate<br/>OSA<br/>(4 &lt; Score &lt; 8)</b> | 27                 | 23                 | 16<br>(14 + 2)               | 34<br>(21 + 13)              |

**Notes:** \* Here, positive means the exclusion of OSA (not having the disease)

**Abbreviations:** OSA, obstructive sleep apnea; TP, true positives; FP, false positives; TN, true negatives; FN, false negatives.

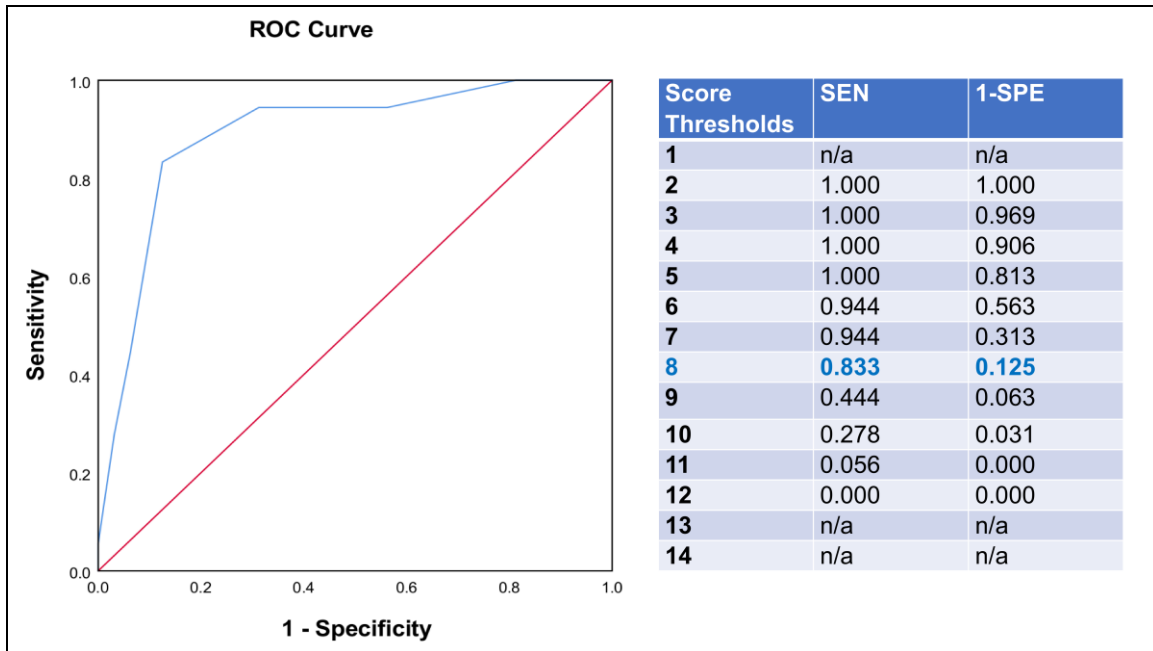

**Supplementary Figure 1** Validation Cohort - Receiver-operating curve and score thresholds for predicting severe obstructive sleep apnea (apnea-hypopnea index  $\geq 30$ ).

**Notes:** Left: ROC curve for score prediction of severe obstructive sleep apnea (apnea-hypopnea index  $\geq 30$ ) within the test cohort. The curve is defined by sensitivity (true positive rate) on the y-axe and 1-specificity (false positive rate) on the x-axe. Points above the diagonal of the plot represent good results, better than random. Right: Sensitivity and 1-specificity for different score thresholds. Highlighted (blue, bold): A score of 8 or above presents the best predictive values.

**Abbreviations:** ROC, receiver-operating characteristics; SEN, sensitivity; SPE, specificity; n/a, score not available in this cohort.

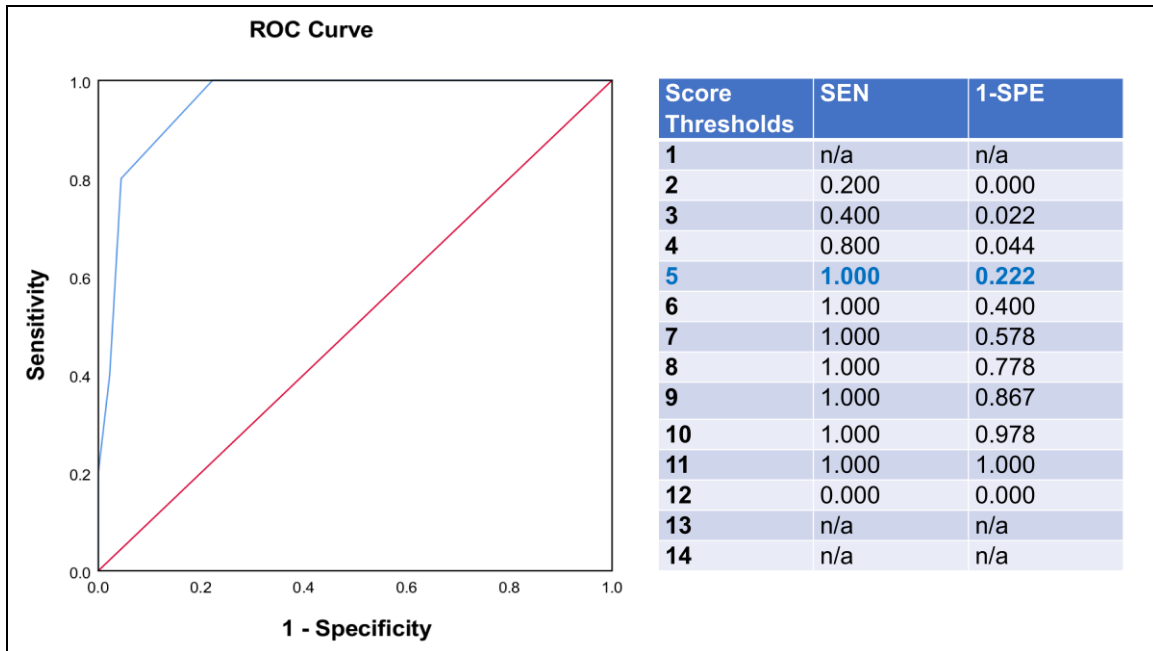

**Supplementary Figure 2:** Validation Cohort - Receiver-operating curve and score thresholds for predicting exclusion of obstructive sleep apnea (apnea-hypopnea index <5).

**Notes:** Left: ROC curve for score prediction of exclusion of obstructive sleep apnea (apnea-hypopnea index <5) within the test cohort. The curve is defined by sensitivity (true positive rate) on the y-axis and 1-specificity (false positive rate) on the x-axis. Points above the diagonal of the plot represent good results, better than random. Right: Sensitivity) and 1-specificity for the different score thresholds. Highlighted (blue, bold): A score of 5 or below presents the best predictive values.

**Abbreviations:** ROC, receiver-operating characteristics; SEN, sensitivity; SPE, specificity; n/a, score not available in this cohort.
